# Supplementary material
Source: Elsevier journal article supplement (https://www.sciencedirect.com/science/article/pii/S2173572721000424)
Supplement: mmc1 [file S2173572721000424:mmc1.pdf]

## SOPORTE VENTILATORIO NO INVASIVO EN PACIENTES CON NEUMONIA POR COVID19: UN REGISTRO MULTICENTRICO ESPAÑOL.

## NON-INVASIVE VENTILATORY SUPPORT IN PATIENTS WITH COVID19 PNEUMONIA: A SPANISH MULTICENTER REGISTRY.

### MATERIAL ELECTRONICO SUPLEMENTARIO

Rafael Fernández, Francisco-Javier González de Molina, Montserrat Batlle, María-del-Mar Fernández, Susana Hernandez, Ana Villagra.

Registramos edad, órdenes de adecuación de soportes vitales y uso o no de la posición en decúbito prono y su eficacia clínica (mejoría de la oxigenación y/o de la disnea) y los tratamientos no invasivos de la insuficiencia respiratoria: oxígeno, presión positiva continua en vía aérea (CPAP), ventilación no invasiva (VNI) y cánulas nasales de alto flujo (CNAF), el nivel máximo de oxígeno utilizado y los peores valores de frecuencia respiratoria y SpO<sub>2</sub> en cada uno de ellos. Como variables de resultado, registramos la necesidad de intubación y la mortalidad en UCI.

Registramos 936 pacientes, de los que 60 (6,4%) fueron definidos como “no candidatos a intubación al ingreso” o fueron considerados no intubables en el momento de precisar intubación, quedando 876 pacientes para el análisis.

La edad media fue de  $61 \pm 12$  años, siendo un factor asociado a necesidad de ventilación invasiva y de mortalidad. Fueron intubados el 43% en <40 años, el 65% entre 40 y 60 años, el 74% entre 61 y 70 y el 80% en mayores de 70, mientras que la mortalidad fue del 6% en <40, 6% entre 40 y 50, 15% entre 50 y 60, 32% entre 61 y 70 y 51% entre >70.

Sólo en pacientes tratados con CNAF la muestra fue suficiente para construir un modelo multivariable de regresión logística asociado a mortalidad en UCI. Las variables que finalmente aparecieron significativas fueron edad (OR 1,09 [1,06-1,12]), índice de ROX (OR 0,65 [0,51-0,81]) y peor SpO<sub>2</sub> (OR 0,92 [0,88-0,98]). Trasladando los coeficientes de la regresión calculamos la mortalidad predicha y la comparamos con la realmente observada (Figura 1 Material suplementario), lo que permitiría definir 4 grupos de riesgo creciente que ayudaría a tomas de decisión mejor informadas.

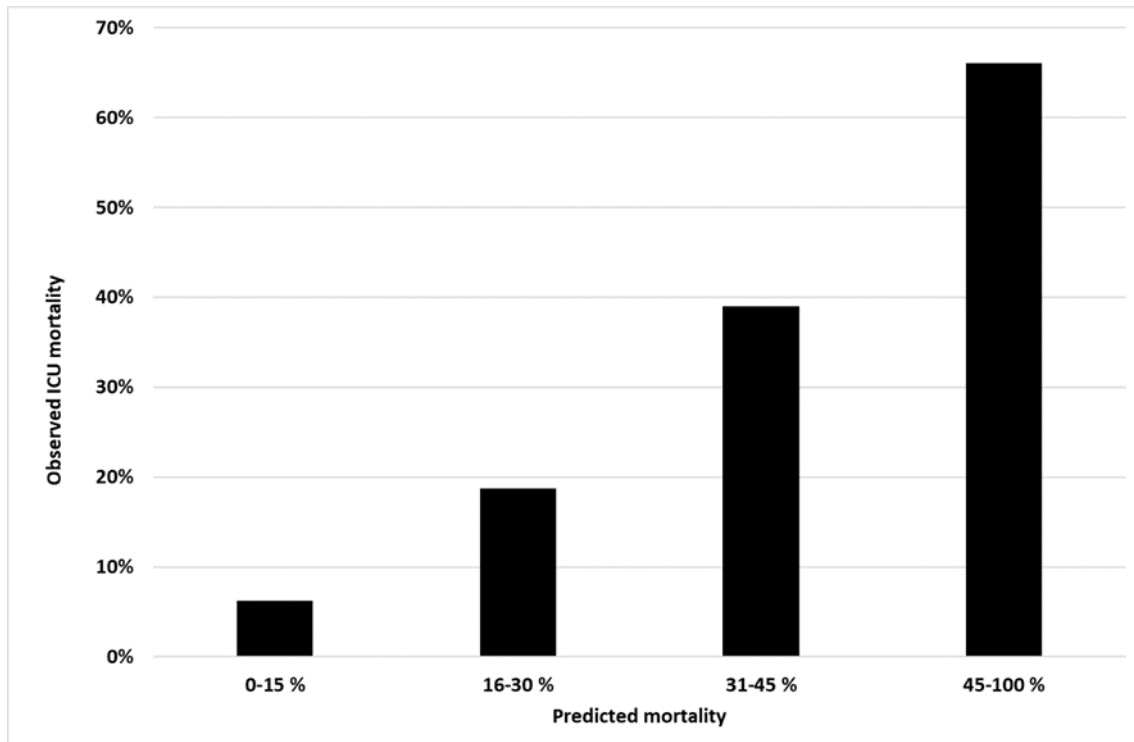

Figura 3.- Correlación entre la mortalidad en UCI en pacientes tratados con CNAF con la predicha en base al modelo de regresión logística basado en edad, índice ROX y mínima SpO2.
